# Supplementary material
Source: MDPI journal article supplement (https://www.mdpi.com/2073-4441/15/20/3583)
Supplement: s1 [file s1]

**Table S1.** Sample information, Major ion content and isotope composition of samples in the study area.

| No     | Type           | pH   | Temp.<br>(°C) | TDS<br>(mg/L) | Na      | K      | Ca     | Mg    | Cl     | SO <sub>4</sub> | HCO <sub>3</sub> | SiO <sub>2</sub> | B     | F     | δD      | δ <sup>18</sup> O |
|--------|----------------|------|---------------|---------------|---------|--------|--------|-------|--------|-----------------|------------------|------------------|-------|-------|---------|-------------------|
|        |                |      |               |               | mg/L    |        |        |       |        |                 |                  |                  |       |       | ‰       | ‰                 |
| TH16*  | Surface water  | 8.00 | 15.5          | 206.00        | 9.60    | 2.20   | 46.70  | 9.60  | 6.70   | 38.10           | 160.00           | 7.00             | -     | -     | -89.90  | -12.80            |
| XG5*   | Surface water  | 7.90 | 9.0           | 153.00        | 0.00    | 1.20   | 37.90  | 8.60  | 2.80   | 32.30           | 118.00           | 4.80             | -     | -     | -102.00 | -13.90            |
| PT8    | Surface water  | 8.55 | 13.3          | 140.00        | 5.47    | 1.40   | 32.81  | 11.21 | 4.03   | 78.04           | 106.79           | 48.81            | 0.00  | 0.38  | -80.58  | -12.80            |
| PT1    | Thermal spring | 8.98 | 63.3          | 345.00        | 117.07  | 3.37   | 9.64   | 0.03  | 37.60  | 201.62          | 121.46           | 98.07            | 0.08  | 17.55 | -90.29  | -13.05            |
| PT2    | Thermal spring | 9.10 | 37.0          | 328.00        | 102.89  | 2.51   | 14.00  | 0.08  | 65.66  | 217.59          | 26.49            | 70.09            | 0.32  | 8.07  | -71.84  | -10.84            |
| PT3    | Thermal spring | 7.44 | 63.1          | 1762.00       | 420.02  | 42.99  | 230.45 | 12.23 | 186.96 | 1791.96         | 362.76           | 161.85           | 0.46  | 4.27  | -73.12  | -11.26            |
| PT4    | Thermal spring | 9.70 | 30.3          | 549.00        | 178.66  | 4.75   | 19.94  | 1.11  | 107.85 | 415.58          | 3.67             | 81.42            | 0.12  | 1.04  | -67.32  | -10.60            |
| PT5    | Thermal spring | 9.92 | 71.9          | 223.00        | 76.69   | 1.69   | 2.42   | 0.02  | 35.16  | 75.73           | 7.13             | 118.32           | 0.08  | 18.97 | -63.62  | -10.55            |
| PT6    | Thermal spring | 8.77 | 70.0          | 291.00        | 88.38   | 4.51   | 8.28   | 0.47  | 52.04  | 131.62          | 87.63            | 116.76           | 0.19  | 4.51  | -74.10  | -11.19            |
| PT7    | Thermal spring | 7.58 | 62.0          | 1402.00       | 438.91  | 50.58  | 56.41  | 10.00 | 230.91 | 403.73          | 1010.83          | 146.85           | 1.91  | 7.82  | -73.49  | -10.61            |
| PT9    | Thermal spring | 6.86 | 38.9          | 556.00        | 98.11   | 11.57  | 91.66  | 15.50 | 48.52  | 170.89          | 528.04           | 88.07            | 2.75  | 3.27  | -77.89  | -11.94            |
| K1*    | Thermal well   | 7.20 | 27.0          | 564.00        | 96.00   | 10.90  | 61.50  | 15.20 | 62.80  | 100.00          | 314.00           | 56.20            | -     | -     | -93.90  | -13.00            |
| K2*    | Thermal well   | 8.40 | 91.0          | 2676.00       | 852.00  | 117.00 | 13.10  | 14.40 | 425.00 | 632.00          | 781.00           | 92.10            | -     | -     | -80.80  | -10.80            |
| K3*    | Thermal well   | 8.60 | 103.0         | 2664.00       | 895.00  | 114.00 | 6.90   | 13.00 | 410.00 | 616.00          | 904.00           | 88.90            | -     | -     | -       | -                 |
| K4*    | Thermal well   | 6.40 | 155.0         | 3664.00       | 1021.00 | 136.00 | 4.10   | 2.20  | 624.00 | 805.00          | 214.00           | 273.00           | -     | -     | -       | -                 |
| KH6**  | Thermal well   | 6.85 | 141.0         | 2995.12       | 1007.34 | 141.48 | 12.06  | 3.66  | 639.58 | 809.76          | 744.59           | -                | 8.90  | 8.33  | -74.53  | -8.72             |
| KH10** | Thermal well   | 6.81 | 100.0         | 2382.87       | 778.70  | 103.07 | 24.12  | 4.39  | 494.06 | 600.19          | 743.37           | -                | 5.20  | 6.44  | -79.98  | -9.90             |
| ZK7**  | Thermal well   | 6.35 | 144.0         | 3313.77       | 1021.02 | 135.82 | 4.07   | 2.22  | 623.49 | 805.34          | 213.57           | -                | 13.10 | 11.41 | -73.10  | -8.30             |

\* Samples from [25];

\*\* Samples from [27]; [37]

**Table S2.** Test results of radioactive elements in Kuzgan granitic pluton and calculation of radioactive heat generation

| NO       | K <sub>2</sub> O/<br>% | Th/<br>(μg/g) | U/<br>(μg/g) | Heat generation rate (μW/m <sup>3</sup><br>) / (μJ/g•a) |        |
|----------|------------------------|---------------|--------------|---------------------------------------------------------|--------|
| 017E     | 7.97                   | 96.56         | 17.04        | 11.78                                                   | 141.97 |
| 019H     | 6.71                   | 57.09         | 3.03         | 5.37                                                    | 64.30  |
| 019J     | 7.98                   | 54.84         | 7.09         | 6.39                                                    | 76.40  |
| 019A2    | 7.17                   | 101.77        | 10.06        | 10.28                                                   | 123.81 |
| 019I     | 6.87                   | 98.72         | 14.40        | 11.14                                                   | 134.38 |
| zb02-1   | 10.39                  | 17.00         | 1.90         | 2.72                                                    | 31.45  |
| zb02-13  | 8.32                   | 82.70         | 15.30        | 10.42                                                   | 125.42 |
| 19002#   | 11.22                  | 50.90         | 15.10        | 8.49                                                    | 101.49 |
| QSH-4##  | 6.33                   | 115.38        | 5.38         | 9.93                                                    | 119.72 |
| 017Eb    | 4.72                   | 58.91         | 7.78         | 6.51                                                    | 78.35  |
| 018E     | 4.92                   | 49.42         | 11.93        | 6.93                                                    | 83.52  |
| 018M     | 3.74                   | 30.22         | 11.54        | 5.40                                                    | 65.03  |
| 018O     | 5.57                   | 110.05        | 27.20        | 15.05                                                   | 182.05 |
| 018U     | 5.58                   | 82.50         | 7.51         | 8.14                                                    | 98.11  |
| zb19-1   | 5.55                   | 10.80         | 8.50         | 3.48                                                    | 41.42  |
| zb29-7   | 6.57                   | 29.50         | 5.10         | 4.00                                                    | 47.58  |
| QSH-1### | 5.13                   | 63.60         | 11.84        | 7.90                                                    | 95.29  |
| QSH-2##  | 4.92                   | 60.22         | 13.89        | 8.17                                                    | 98.59  |
| QSH-3##  | 4.97                   | 95.05         | 15.25        | 10.91                                                   | 131.88 |

Unmarked, [53]; #, Pan Yusheng (2000); ##, This study.

**Table S3.** Test results of radioactive elements in Karibasheng granitic pluton and calculation of radioactive heat generation

| No       | K <sub>2</sub> O<br>/% | Th/<br>(μg/g) | U/<br>(μg/g) | Heat generation rate (μW/m <sup>3</sup><br>) / (μJ/g•a) |        |
|----------|------------------------|---------------|--------------|---------------------------------------------------------|--------|
| 019M     | 5.07                   | 61.80         | 7.05         | 6.55                                                    | 78.88  |
| 9002#    | 4.89                   | 125.00        | 12.80        | 12.33                                                   | 149.14 |
| 9003#    | 4.63                   | 53.20         | 7.00         | 5.91                                                    | 71.08  |
| 14008#   | 4.80                   | 49.80         | 9.80         | 6.40                                                    | 77.11  |
| QSH-3### | 5.20                   | 80.69         | 14.10        | 9.66                                                    | 116.61 |

Labels are same as above Table S2

## References

- Ke, S., 2006. Petrogenesis of Taxkorgan Alkaline Complex Belt and Its Tectonic Significance. China University of Geosciences, Beijing.
- Li, Y.M., Pang, Z.H., Yang, F.T., Yuan, L.J., Tang, P.H., 2017. Hydrogeochemical characteristics and genesis of the high-temperature geothermal system in the Tashkorgan basin of the Pamir syntax, western China. *J Asian Earth Sci* 149, 134-144.
- Shi, J., Lu, C., Li, Q., Chang, Z., 2018. Progress in research on the geothermal resources in Taxkorgan Valley, Xinjiang. *Geological Survey of China (in Chinese)* 5, 8-10.
- Shi, J., Wang, M., Ma, X., Zhang, W., Zhu, L., 2022. Isotope and Hydrogeochemical Characteristics of the Quman High Temperature Geothermal Field in Taxkorgan, Xinjiang. *Acta Geoscientica Sinica (in Chinese with English abstract)* 43.
